# Supplementary material
Source: MDPI journal article supplement (https://www.mdpi.com/2227-9717/11/11/3254)
Supplement: s1 [file s1 › processes-2529820-supplementary.pdf]

# Supplementary Materials

**Table S1.** FA calculation formulas.

| Formulas                                                                                                   |      |
|------------------------------------------------------------------------------------------------------------|------|
| $X_i = F_i \times \frac{A_i}{A_{C11}} \times \frac{\rho_{C11} \times V_{C11} \times 1.0067}{m} \times 100$ | (1)  |
| $F_i = \frac{\rho_{Si} \times A_{11}}{A_{Si} \times \rho_{11}}$                                            | (2)  |
| $X_{SFA_i} = X_{FAME_i} \times F_{FAME_i-FA_i}$                                                            | (3)  |
| $X_{Saturated\ Fat} = \sum X_{SFA_i}$                                                                      | (4)  |
| $X_{MUFA_i} = X_{FAME_i} \times F_{FAME_i-FA_i}$                                                           | (5)  |
| $X_{Mono-Unsaturated\ Fat} = \sum X_{MUFA_i}$                                                              | (6)  |
| $X_{PUFA_i} = X_{FAME_i} \times F_{FAME_i-FA_i}$                                                           | (7)  |
| $X_{Poly-Unsaturated\ Fat} = \sum X_{PUFA_i}$                                                              | (8)  |
| $F_{FAME_i-FA_i} = \frac{M_{FA_i}}{M_{FAME_i}}$                                                            | (9)  |
| $X_{Total\ Fat} = \sum X_i \times F_{FAME_i-TG_i}$                                                         | (10) |
| $F_{FAME_i-TG_i} = \frac{M_{TG_i} \times \frac{1}{3}}{M_{FAME_i}}$                                         | (11) |

Note: Formula (1)  $X_i$  is the FAME<sub>i</sub> content in the sample, the unit is grams per hectogram (g/100g);  $F_i$  is the response factor of FAME<sub>i</sub>;  $A_i$  is the peak area of FAME<sub>i</sub> in the sample;  $A_{C11}$  is the peak area of the internal standard substance-methyl undecacarbonate added to the sample;  $\rho_{C11}$  is the concentration of triglyceride undecanoate in milligrams per milliliter (mg/ml);  $V_{C11}$  is the volume of triglyceride undecacarbonate added to the sample, in milliliters (ml); 1.0067 is the conversion factor of triglyceride undecacarbonate into methyl undecacarbonate;  $m$  is the mass of the sample, in milligrams (mg); 100 is a factor to convert the content to the content per 100 g of the sample.

In formula (2),  $\rho_{Si}$  is the concentration of each FAME<sub>i</sub> in the mixed standard, in milligrams per milliliter (mg/ml);  $A_{11}$  and  $A_{Si}$  are the peak areas of methyl undecacarbonate and FAME<sub>i</sub>, respectively.

In formula (3) and formula (4),  $X_{Saturated\ Fat}$  and  $X_{SFA_i}$  are the SFA content and the single SFA content in the sample, respectively, and the unit is grams per hectogram (g/100g);  $X_{FAME_i}$  is the content of SFA methyl ester, in grams per hectogram (g/100g);  $-FA_i$  is the coefficient for converting FAME to FA.

In formula (5) and formula (6),  $X_{Mono-Unsaturated\ Fat}$  and  $X_{MUFA_i}$  are the MUFA content in the sample and the single MUFA content in the sample, respectively, in grams per hectogram (g/100g);  $X_{FAME_i}$  is the content of each MUFA methyl ester, in grams per hectogram (g/100g).

In formula (7) and formula (8),  $X_{Poly-Unsaturated\ Fat}$  and  $X_{PUFA_i}$  are the content of PUFA and single PUFA in the sample, respectively, the unit is grams per hectogram (g/100g);  $X_{FAME_i}$  is the content of a single PUFA methyl ester, in grams per hectogram (g/100g).

In formula (9),  $M_{FAi}$  and  $M_{FAMEi}$  are the molecular weights of  $FA_i$  and  $FAME_i$ , respectively.

In formulas (10) and (11),  $X_{Total\ Fat}$  is the total fat content in the sample in grams per hectogram (g/100g);  $X_i$  is the content of a single  $FAME_i$  in the sample in grams per hectogram (g/100g);  $F_{FAMEi-TGi}$  is the coefficient of conversion of  $FAME_i$  into triglyceride;  $M_{TGi}$  is the molecular mass of FA triglyceride I;  $M_{FAMEi}$  is the molecular mass of  $FAME_i$ .

**Table S2.** Formulas for the calculation of TFAs.

| Contents                                           | Formulas                                                        |
|----------------------------------------------------|-----------------------------------------------------------------|
| The relative mass fraction of each component tFAME | $\omega_x = \frac{A_x \times f_x}{A_t} \times 100\% \quad (12)$ |
| TFA mass fraction in fat                           | $\omega_t = \sum \omega_x \quad (13)$                           |
| Fat mass fraction in food                          | $\omega_z = \frac{m_1 - m_0}{m_2} \times 100\% \quad (14)$      |
| TFA mass fraction in food                          | $\omega = \omega_t \times \omega_z \quad (15)$                  |
| FID correction factor for each component           | $f_x = \frac{F_x}{F_{16:0}} \quad (16)$                         |
| FID response factor for each component             | $F_x = \frac{M_x}{(n_x - 1)A_c} \quad (17)$                     |

Note: Formula (1) Note: Formula (12)  $x$  is the relative mass fraction of the TFA component  $X$  species of FAME calculated by the normalization method, %;  $A_x$  and  $f_x$  are the peak area and correction factor of FAME in component  $x$ , respectively;  $A_t$  is the sum of the calibrated areas of all peaks after removal of the solvent peak.

In formula (13),  $\omega_t$  is the mass fraction of TFA in fat, %.

Formula (14)  $\omega_z$  is the mass fraction of fat in the sample, %;  $m_0$  and  $m_2$  are the mass of the round-bottomed flask and the sample, respectively, in grams (g);  $m_1$  is the total mass of the round bottom flask and fat in grams (g).

In formula (15),  $\omega$  is the mass fraction of TFA in food, %;  $\omega_z$  is the mass fraction of fat in food, %. In formula (16),  $f_x$  is the correction factor of FAME in component  $X$ ;  $F_x$  is the response factor for the FID of FAME in component  $X$ ;  $F_{16:0}$  is the FID response factor for C16:0 (as a reference value, 1.407).

In formula (17),  $M_x$  is the relative molar mass of FAME in component  $X$ ;  $n_x$  is the number of carbon atoms contained in FAME in component  $X$ ;  $A_c$  is the relative atomic mass of the carbon atom (12.01).

**Table S3.** Comparison of FA content of deep-fried dough stick samples from five cities (g/100 g).

| Region       | Fatty acid content |              |             |             |
|--------------|--------------------|--------------|-------------|-------------|
|              | MUFA               | PUFA         | tFA         | SFA         |
| Beijing      | 6.188±3.921        | 8.973±3.199  | 0.209±0.113 | 4.233±1.942 |
| Shijiazhuang | 3.695±1.441*       | 6.451±2.347  | 0.222±0.109 | 4.048±1.998 |
| Hangzhou     | 4.944±1.993        | 9.222±3.980  | 0.275±0.186 | 4.127±2.045 |
| Guangzhou    | 7.235±3.518        | 5.010±3.409* | 0.183±0.107 | 8.638±4.740 |
| Chongqing    | 6.524±3.685        | 9.480±2.163  | 0.247±0.150 | 3.622±0.696 |

\*It indicates that there is a significant difference compared with Beijing Formation (P<0.05)
